# Supplementary material for: Facile thermal annealing of graphite oxide in air for graphene with a higher C/O ratio
Source: Royal Society of Chemistry journal article supplement (doi:10.1039/c5ra09388k), 2015-01-01
Supplement: c5ra09388k1.pdf [file c5ra09388k1.pdf]

1 **Facile Two-step thermal annealing of graphite oxide in air for graphene with a**  
2 **higher C/O ratio**

3 Suyun Tian<sup>a,b</sup>, Jing Sun<sup>b</sup>, Siwei Yang<sup>b</sup>, Peng He<sup>b</sup>, Shengju Ding<sup>b</sup>, Guqiao Ding<sup>b\*</sup>,  
4 Xiaoming Xie<sup>a,b</sup>

5 <sup>a</sup>School of Physical Science and Technology, ShanghaiTech University, Shanghai  
6 200050, P.R. China.

7 <sup>b</sup>State Key Laboratory of Functional Materials for Informatics, Shanghai Institute of  
8 Microsystem and Information Technology, Chinese Academy of Science, Shanghai  
9 20050, P. R. China

10  
11  
12

Table S1. The C/O ratio of thermal reduced graphene from the literatures

| C/O ratio | Temperature (°C) | Conductions (time, atmosphere, pressure, catalyst) | Ref. |
|-----------|------------------|----------------------------------------------------|------|
| 7.7       | 100              | 6h, Ar                                             | 6    |
| 6.95-10.2 | 100-200          | 3h, vacuum, metal Al as catalyst                   | 7    |
| 9.3       | 100-200          | 6h, Air, benzyl alcohol                            | 6    |
| 4         | 200              | 1h, Ar                                             | 8    |
| 7.3-9.9   | 500-700          | 60s, vacuum                                        | 4    |
| 6.3/12.4  | 500/1000         | 5min, Ar (80%) / H <sub>2</sub> (20%)              | 9    |
| 10        | 650              | Ar/4%H <sub>2</sub>                                | 10   |
| 25        | 750              | Ar/4%H <sub>2</sub>                                | 10   |
| 3.9-14.1  | 200-1000         | under Ar, Ar/H <sub>2</sub> or UHV                 | 11   |
| 110       | 1000             | Ar/4%H <sub>2</sub>                                | 10   |
| 5.6-7.9   | 1050             | 30s, Ar;                                           | 12   |
| 10        | 1050             | 30s Ar                                             | 13   |
| 24-340    | 1100             | with different time or second thermal treatments   | 4    |

13  
14

\* Corresponding author. Tel: 0086-21-62511070-3409. Fax: 0086-21-62127493

Email address: gqding@mail.sim.ac.cn (G. Q. Ding)

15  
16  
17  
18  
19  
20  
21  
22  
23  
24  
25  
26  
27  
28  
29

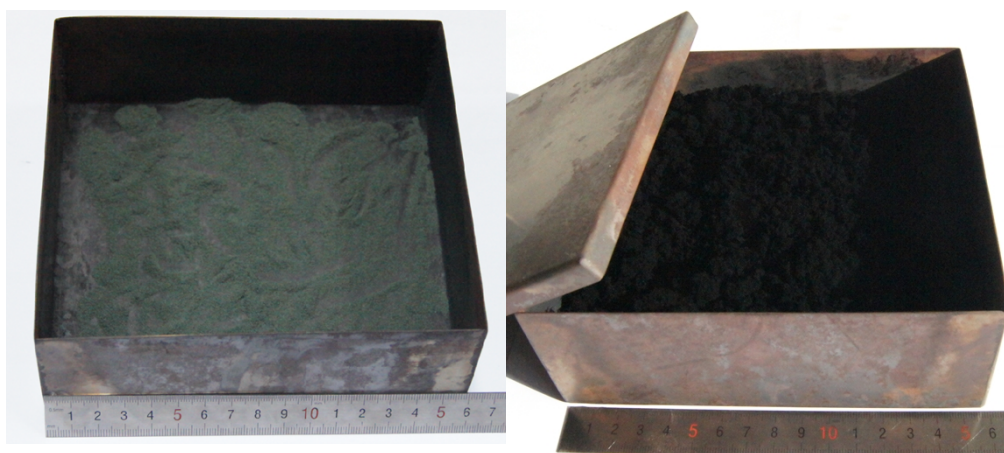

30 Fig. S1- the self-designed container for the thermal exfoliation and reduction: (a) 1g  
31 graphite oxide in the container, (b) the obtained graphene after thermal annealing  
32 under 550 °C 30s in air.

33  
34  
35  
36

37 Table S2. The yield of graphene thermal annealed in air under 250-1050 °C for 10 to  
38 120s. 1g graphite oxide was used as precursor.

| Temp. \ Time | 10s  | 30s  | 60s  | 120s |
|--------------|------|------|------|------|
| 250 °C       | /    | 0.53 | /    | 0.58 |
| 350 °C       | /    | 0.56 | /    | /    |
| 450 °C       | 0.46 | 0.57 | 0.56 | 0.48 |
| 550 °C       | 0.53 | 0.44 | 0.50 | 0.46 |
| 650 °C       | 0.56 | 0.55 | 0.46 | 0.25 |
| 750 °C       | 0.48 | 0.36 | 0.17 | 0.10 |
| 850 °C       | 0.43 | 0.35 | 0.23 | 0.09 |

|         |   |      |   |   |
|---------|---|------|---|---|
| 950 °C  | / | 0.32 | / | / |
| 1050 °C | / | 0.29 | / | / |

39  
40  
41  
42  
43

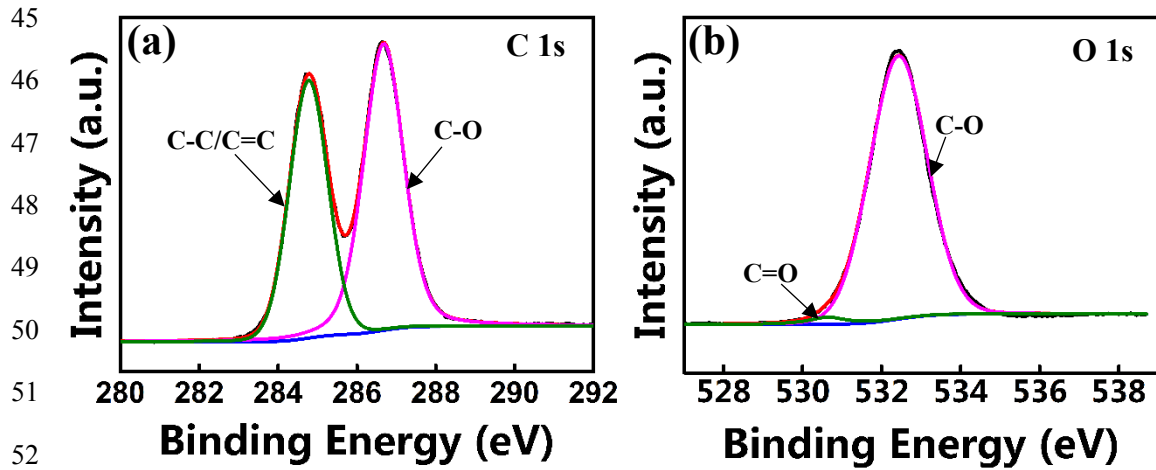

Fig. S2 - XPS C1s and O1s spectrum of graphite oxide. (a) C1s spectrum of GO, the proportion of C-C/C=C and C-O groups is 47.9% and 52.1% respectively. (b) O1s spectrum of GO, the proportion of C-O and C=O groups is about 97.7% and 2.3%.

| BET      | Temperatur<br>e ( °C) | Conductions<br>(time, atmosphere, pressure, catalyst) | Ref.      |
|----------|-----------------------|-------------------------------------------------------|-----------|
| 18       | 100                   | 6h, Ar                                                | S1        |
| 758      | 135                   | 24h, vacuum                                           | S2        |
| 500-750  | 130-200               | 8min, ambient atmosphere, volatile HCl                | S3        |
| 368-382  | 200-400               | 5h, High vacuum                                       | S4        |
| 62.2-403 | 300-600               | 2h, N <sub>2</sub>                                    | S5        |
| 960      | 500                   | 1h, inert gas, metal agglomeration, many steps        | S6        |
| 600-1500 | 1050                  | 30s, Ar                                               | S7        |
| 1200     | 1050                  | 30s, Ar (pretreat for 10min in Ar)                    | S8        |
| 569-703  | 450                   | 10-120s, air                                          | This work |

Table S3. The BET data from literatures about thermal annealing

65  
66

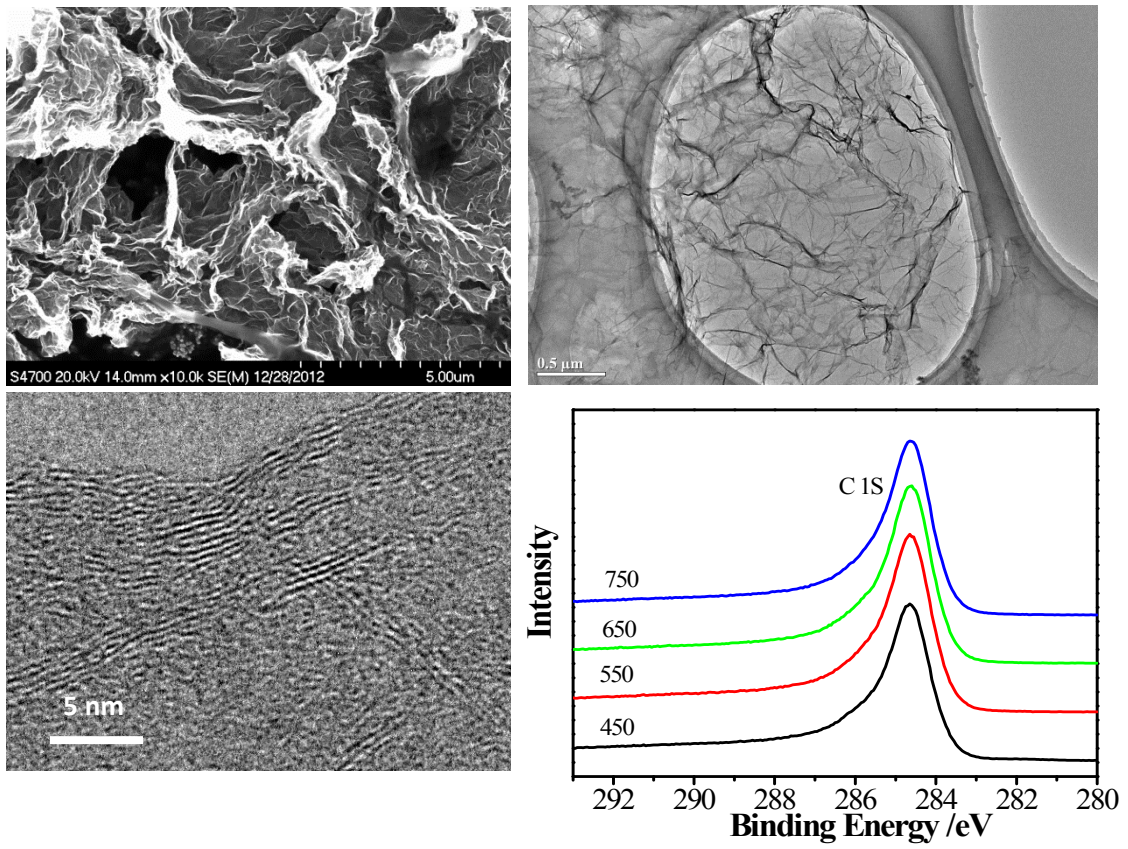

67 Fig. S3 - the SEM image (a), the TEM image (b), The HRTEM image (c) of the  
68 samples annealed under 550 °C for 30s, and XPS C1s of samples under 450-750 °C.

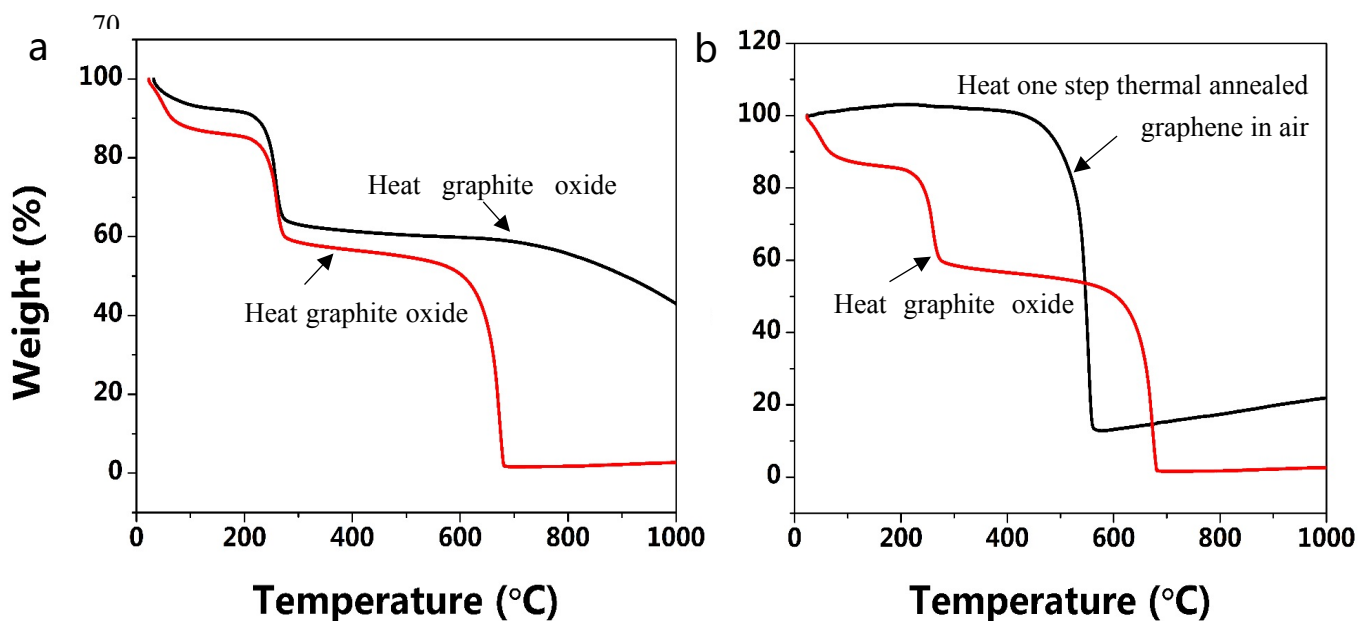

80

81 Fig. S4 – TGA data: (a) TGA spectra of the graphite oxide in air and in N<sub>2</sub>. (b) TGA  
 82 spectra of the graphite oxide and one step thermal annealed graphene in air.

83

84 The TGA spectra of graphite oxide and one-step annealed graphene samples are  
 85 shown In Fig. S4a. Heating graphite oxide in air, the spectra exhibits three stage of  
 86 weight losing: the first stage happens below 100 °C due to the H<sub>2</sub>O loss; The second  
 87 stage happens between 250 and 300 °C due to the transformation from oxygen-  
 88 containing groups into CO and CO<sub>2</sub>; The third stage is around 550 °C due to the  
 89 further transformation and removal of residual functional groups. However, for  
 90 heating graphite oxide in N<sub>2</sub>, because of the protection of N<sub>2</sub> atmosphere, it shows a  
 91 slow and gradual weight loss from 400-1000 °C. These results indicate the important  
 92 effect of oxygen for the thermal annealing, especially when the temperature over 400  
 93 °C. We also did the test to compare the TGA of reduced graphene oxide and graphite  
 94 oxide in air, as shown In Fig. S4b. For the one-step thermal annealing graphene, the

95 spectra have only a weight loss around 550 °C. It doesn't have the obvious weight loss  
96 before 400 °C, and the weight loss around 550 °C is due to the carbon burning in air.  
97 The fast weight loss around 550 °C on the TGA curve of one-step annealed graphene  
98 indicates that one cannot treat graphene in air when the temperature is higher than 550  
99 °C. We can get reduced graphene from 450 to 850 °C without air protection due to the  
100 released gas protection inside the box.

101

102

103

104

105

106

107

108

109

110

111

112

113

114

115

116

117

118

119

120

121

122

123

124

125

126

127

128

129

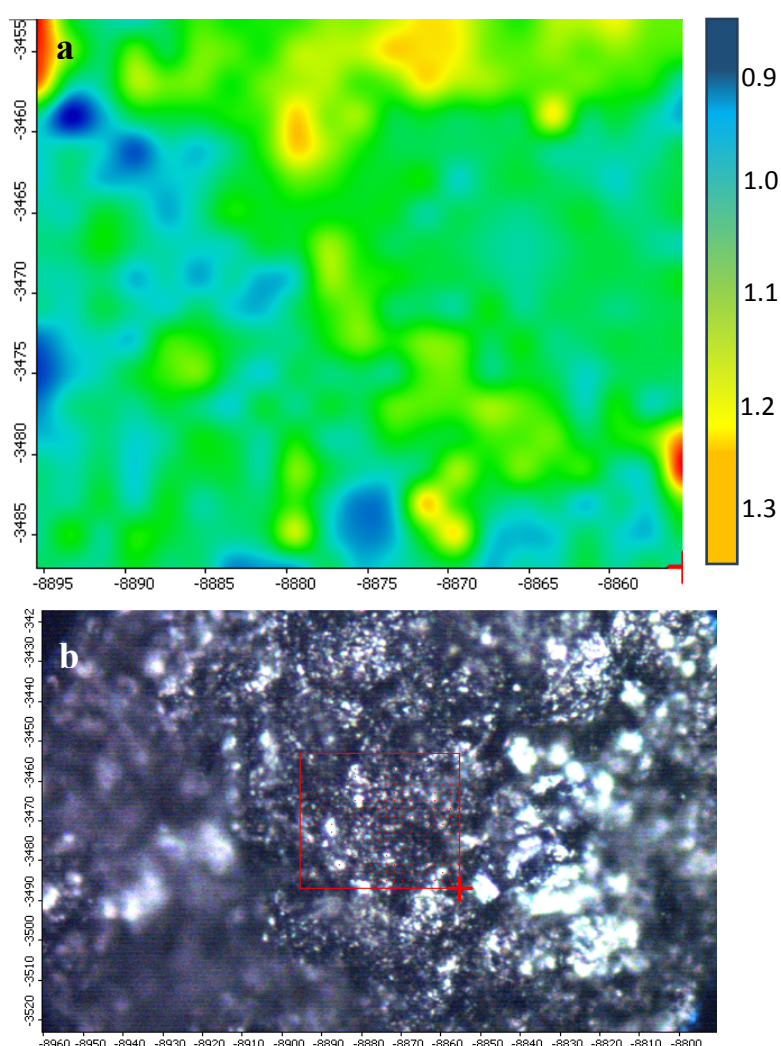

Fig. S5 – a)  $I_D/I_G$  Raman mapping of two-step annealed graphene on 30  $\mu\text{m}$ \*30  $\mu\text{m}$  surface of a graphene bulk prepared by pressing fluffy graphene powder.

130 **REFERENCES**

- 131 **S1:** Geng LL, Wu SJ, Zou YG, Jia MJ, Zhang WX, Yan WF, et al. Correlation  
132 between the microstructures of graphite oxides and their catalytic behaviors in air  
133 oxidation of benzyl alcohol. *Journal of Colloid and Interface Science*  
134 2014;421:71–7.
- 135 **S2:** Zhang HB, Wang JW, Yan Q, Zheng WG, Chen C, Yu ZZ. Vacuum-assisted  
136 synthesis of graphene from thermal exfoliation and reduction of graphite oxide. *J*  
137 *Mater Chem* 2011;21:5392–7.
- 138 **S3:** Shen B, Lu DD, Zhai WT, Zheng WG. Synthesis of graphene by low-temperature  
139 exfoliation and reduction of graphite oxide under ambient atmosphere. *J. Mater.*  
140 *Chem. C* 2013;1:50-3.
- 141 **S4:** Lv W, Tang DM, He YB, You CH, Shi ZQ, Chen XC, et al. Low-temperature  
142 exfoliated graphenes vacuum-promoted exfoliation and electrochemical energy  
143 storage. *ACS nano* 2009;3:3730-6.
- 144 **S5:** Kim JM, Hong WG, Lee SM, Chang SJ, Jun Y, Kim BH, et al. Energy storage of  
145 thermally reduced graphene oxide. *International Journal of Hydrogen Energy*  
146 2014;39:3799-804.
- 147 **S6:** Yamada Y, Suzuki Y, Yasuda H, Uchizawa S, Hirose-Takai K, Sato Y, et al.  
148 Functionalized graphene sheets coordinating metal cations. *Carbon* 2014;75:81–  
149 94.
- 150 **S7:** Schniepp HC, Li JL, McAllister MJ, Sai H, Herrera-Alonso M, Adamson DH, et  
151 al. Functionalized single graphene sheets derived from splitting graphite oxide. *J.*  
152 *Phys. Chem. B* 2006;110:8535-9.
- 153 **S8:** Xin GQ, Sun H, Scott SM, Yao TK, Lu FY, Shao DL, et al. Advanced phase  
154 change composite by thermally annealed defect-free graphene for thermal energy  
155 storage. *ACS Appl. Mater. Interfaces* 2014;6:15262–71.
